# Supplementary material
Source: Springer Nature journal article supplement (https://www.springermedizin.de/resource/supplementary/13024_2012_361_MOESM6_ESM.pdf/9643816)

**A**

- sonication of exosomes

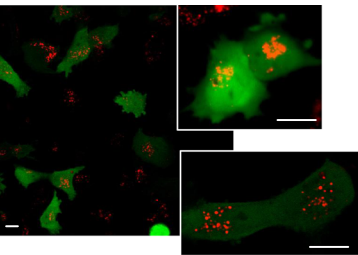

+ sonication of exosomes

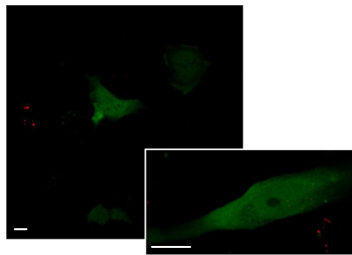**B**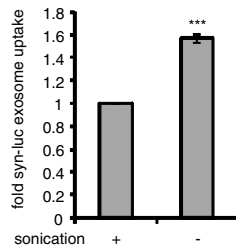**C**

- sonication of exosomes

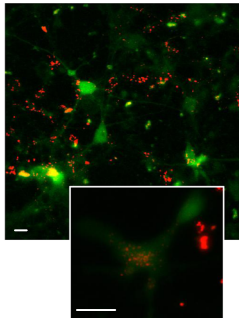

+ sonication of exosomes

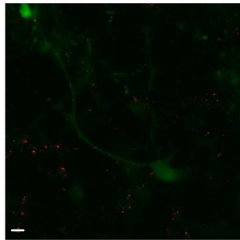**D**

flotillin

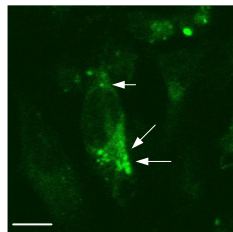

DiD

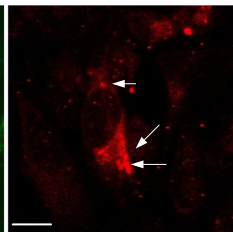

merged

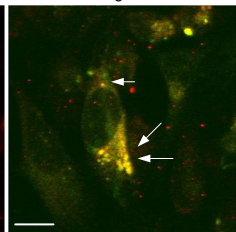

Supplement: MOESM6 [file 9643816]
